# Supplementary material
Source: PubMed Central journal article supplement (PMC5119012)
Supplement: AAC.01613-16_zac012165754so1.pdf [file AAC.01613-16_zac012165754so1.pdf]

**Supplementary table 1.** The annotation of the regions encoding the rRNA operons for strain COL.

| locus            | begin     | end       | gene         | encodes                                                         |
|------------------|-----------|-----------|--------------|-----------------------------------------------------------------|
| SACOL0521        | 527,373   | 527,690   | -            | conserved hypothetical protein                                  |
| SACOL0522        | 527,697   | 528,293   | <i>recR</i>  | recombination protein RecR                                      |
| SACOL_Sa16SA     | 529,146   | 530,700   | <i>rrsA</i>  | 16S ribosomal RNA                                               |
| SACOL_Sa23SA     | 531,065   | 533,987   | <i>rrlA</i>  | 23S ribosomal RNA                                               |
| SACOL_Sa5SA      | 534,060   | 534,174   | <i>rrfA</i>  | 5S ribosomal RNA                                                |
| SACOL0523        | 535,057   | 536,394   | -            | Orn/Lys/Arg decarboxylase                                       |
| SACOL0524        | 536,396   | 537,013   | <i>tmk</i>   | thymidylate kinase                                              |
| \\               |           |           |              |                                                                 |
| SACOL_Sa5SG      | 572,452   | 572,566   | <i>rrfG</i>  | 5S ribosomal RNA                                                |
| SACOL_tRNA-Ala-1 | 572,579   | 572,654   | -            | tRNA-Ala                                                        |
| SACOL_Sa16SB     | 572,776   | 574,330   | <i>rrsB</i>  | 16S ribosomal RNA                                               |
| SACOL_tRNA-Ile-1 | 574,423   | 574,499   | -            | tRNA-Ile                                                        |
| SACOL_Sa23SB     | 574,667   | 577,589   | <i>rrlB</i>  | 23S ribosomal RNA                                               |
| SACOL_Sa5SB      | 577,662   | 577,776   | <i>rrfB</i>  | 5S ribosomal RNA                                                |
| SACOL_Sa16SC     | 577,988   | 579,542   | <i>rrsC</i>  | 16S ribosomal RNA                                               |
| SACOL_Sa23SC     | 579,845   | 582,767   | <i>rrlC</i>  | 23S ribosomal RNA                                               |
| SACOL_Sa5SC      | 582,840   | 582,954   | <i>rrfC</i>  | 5S ribosomal RNA                                                |
| SACOL0563        | 583,479   | 584,861   | -            | transcriptional regulator, GntR family                          |
| SACOL0564        | 584,965   | 585,852   | -            | pyridoxine biosynthesis protein                                 |
| \\               |           |           |              |                                                                 |
| SACOL_tRNA-Thr-2 | 1,976,762 | 1,976,837 | -            | tRNA-Thr                                                        |
| SACOL_tRNA-Val-1 | 1,976,854 | 1,976,929 | -            | tRNA-Val                                                        |
| SACOL_Sa5SD      | 1,976,941 | 1,977,055 | <i>rrfD</i>  | 5S ribosomal RNA                                                |
| SACOL_Sa23SD     | 1,977,128 | 1,980,050 | <i>rrlD</i>  | 23S ribosomal RNA                                               |
| SACOL_tRNA-Ala-3 | 1,980,264 | 1,980,339 | -            | tRNA-Ala                                                        |
| SACOL_tRNA-Ile-2 | 1,980,358 | 1,980,434 | -            | tRNA-Ile                                                        |
| SACOL_Sa16SD     | 1,980,524 | 1,982,078 | <i>rrsD</i>  | 16S ribosomal RNA                                               |
| SACOL1919        | 1,982,818 | 1,983,264 | -            | transcriptional regulator, Fur family                           |
| SACOL1920        | 1,983,361 | 1,984,311 | -            | D-isomer specific 2-hydroxyacid<br>dehydrogenase family protein |
| \\               |           |           |              |                                                                 |
| SACOL2050        | 2,110,529 | 2,111,797 | <i>ilvA2</i> | threonine dehydratase                                           |
| SACOL2051        | 2,111,846 | 2,112,001 | -            | hypothetical protein                                            |
| SACOL_Sa5SE      | 2,112,007 | 2,112,121 | <i>rrfE</i>  | 5S ribosomal RNA                                                |
| SACOL_Sa23SE     | 2,112,194 | 2,115,116 | <i>rrlE</i>  | 23S ribosomal RNA                                               |
| SACOL_Sa16SE     | 2,115,663 | 2,117,217 | <i>rrsE</i>  | 16S ribosomal RNA                                               |
| SACOL_tRNA-Gly-4 | 2,117,335 | 2,117,408 | -            | tRNA-Gly                                                        |
| SACOL_tRNA-Leu-4 | 2,117,428 | 2,117,513 | -            | tRNA-Leu                                                        |
| \\               |           |           |              |                                                                 |
| SACOL_tRNA-Asn-3 | 2,228,412 | 2,228,486 | -            | tRNA-Asn                                                        |
| SACOL_tRNA-Glu-3 | 2,228,339 | 2,228,410 | -            | tRNA-Glu                                                        |
| SACOL_Sa5SF      | 2,228,497 | 2,228,611 | <i>rrfF</i>  | 5S ribosomal RNA                                                |
| SACOL_Sa23SF     | 2,228,684 | 2,231,606 | <i>rrlF</i>  | 23S ribosomal RNA                                               |
| SACOL_Sa16SF     | 2,232,153 | 2,233,707 | <i>rrsF</i>  | 16S ribosomal RNA                                               |
| SACOL2156        | 2,234,163 | 2,235,227 | -            | ATP-binding protein, Mrp/Nbp35 family                           |
| SACOL2157        | 2,235,375 | 2,236,817 | -            | drug resistance transporter, EmrB/QacA<br>subfamily             |

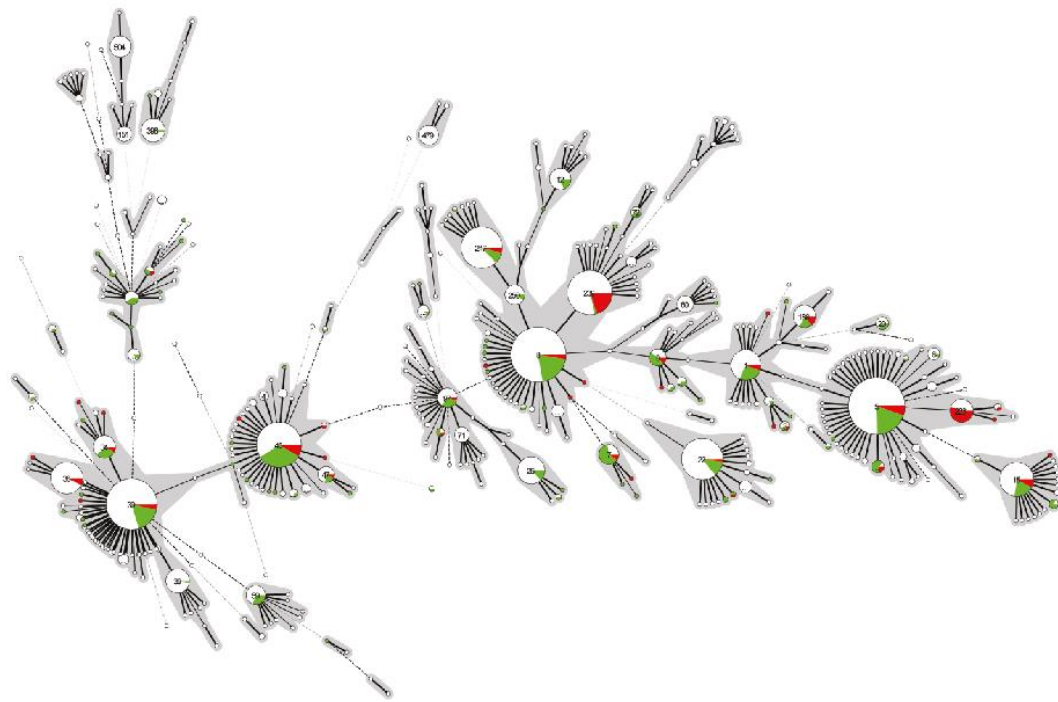

**Supplementary figure 1. MLST-based Minimal Spanning Tree of *S. aureus***

A minimal spanning tree was constructed of 1350 strains from <http://saureus.mlst.net/> supplemented with 146 MRSA, 195 MSSA and 105 CF isolates from our collection. The pie chart indicates the distribution of isolates used in this study within the total *S. aureus* population. The colors of the pie indicate the number of rRNA operons, red corresponds with 5 rRNA operons and green with 6 rRNA operons. Each sequence type (ST) is represented by a circle in which the circle size corresponds to the number of isolates. Heavy lines between two STs denote a difference in a single locus, thin lines denote double-locus variants, and dotted lines connect STs differing in more than 2 loci.

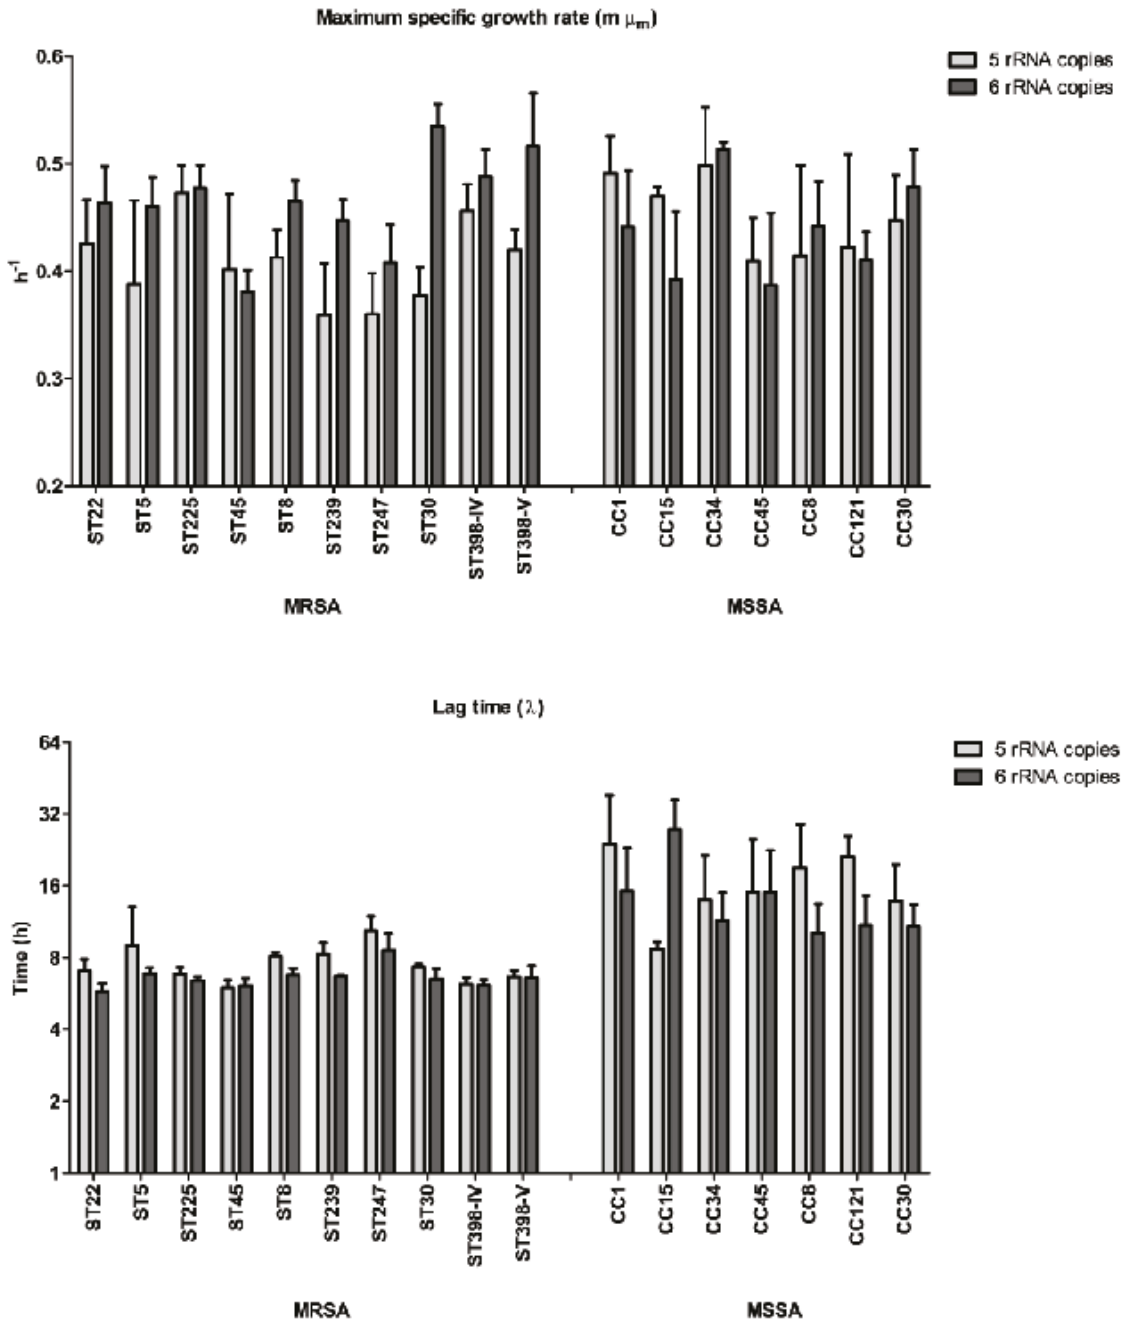

**Supplementary figure 2. *In vitro* growth analysis for individual STs/CCs**

The growth parameters for each ST (MRSA) or CC (MSSA) are shown, maximum specific growth rate (upper panel) and lag time (lower panel).
